# Supplementary material for: Mechanics and kinetics of dynamic instability
Source: eLife. 2020 May 11;9:e54077. doi: 10.7554/eLife.54077 (PMC7213977; doi:10.7554/eLife.54077)
Supplement: Appendix 2—figure 3—source data 1. [file elife-54077-app2-fig3-data1.xls]

## Sheet: Sheet1
	Data for Appendix Figure 5A				Data for Appendix Figure 5A (inset)
	B	kappa_c			S	kappa_c
	0.505689	30.4699			0.985653	1.63452
	0.707155	27.0055			1.95827	2.35714
	1	23.9349			4.92962	3.89008
	1.99973	17.6185			8.7014	5.19375
	4.9451	10.8715			19.0041	7.93563
	10	7.49894			47.8395	13.0965
	19.775	5.17261			92.7708	20.7966
	49.451	3.31254
	95.6274	2.37137
