# Supplementary material for: Mechanics and kinetics of dynamic instability
Source: eLife. 2020 May 11;9:e54077. doi: 10.7554/eLife.54077 (PMC7213977; doi:10.7554/eLife.54077)
Supplement: Figure 3—source data 1. [file elife-54077-fig3-data1.xls]

## Sheet: Sheet1
	Data for Figure 3B (no disorder)			Data for Figure 3C (lateral disorder)			Data for Figure 3D (longitudinal disorder)
	alpha	beta		alpha	beta		alpha	beta
	1.00014	0.0012151		0.979852	0.0233586		1.0374	0.000325373
	0.988902	0.128317		0.923403	0.147074		1.01441	0.123211
	0.975139	0.127992		0.881447	0.280525		1.00699	0.123135
	0.945274	0.254654		0.865428	0.280034		0.969905	0.248199
	0.937584	0.256266		0.808978	0.424657		0.945429	0.250273
	0.882628	0.391305		0.756343	0.574042		0.893509	0.384478
	0.818372	0.540475					0.812663	0.543941
