# Supplementary material for: Mechanics and kinetics of dynamic instability
Source: eLife. 2020 May 11;9:e54077. doi: 10.7554/eLife.54077 (PMC7213977; doi:10.7554/eLife.54077)
Supplement: Figure 4—source data 1. [file elife-54077-fig4-data1.xls]

## Sheet: Sheet1
0.01	0.01	0.01	0.01	0.01	0.1	0.3	0.6	0.9	1	1	1	1	1	1	1	1	1	1	1	1
0.01	0.01	0.01	0.01	0.01	0.01	0.2	0.4	0.7	0.8	0.9	1	1	1	1	1	1	1	1	1	1
0.01	0.01	0.01	0.01	0.01	0.01	0.1	0.2	0.4	0.6	1	1	1	1	1	1	1	1	1	1	1
0.01	0.01	0.01	0.01	0.01	0.01	0.01	0.1	0.3	0.3	0.9	1	1	1	1	1	1	1	1	1	1
0.01	0.01	0.01	0.01	0.01	0.01	0.01	0.01	0.01	0.2	0.5	0.5	0.9	0.9	0.9	1	1	1	1	1	1
0.01	0.01	0.01	0.01	0.01	0.01	0.01	0.01	0.01	0.1	0.2	0.2	0.4	0.6	0.7	1	1	1	1	1	1
0.01	0.01	0.01	0.01	0.01	0.01	0.01	0.01	0.01	0.01	0.01	0.01	0.01	0.1	0.1	0.3	0.4	0.4	0.4	0.8	1
0.01	0.01	0.01	0.01	0.01	0.01	0.01	0.01	0.01	0.01	0.01	0.01	0.01	0.01	0.01	0.01	0.01	0.01	0.01	0.01	0.01
